# Supplementary material for: A novel model based on clinical and computed tomography (CT) indices to predict the risk factors of postoperative major complications in patients undergoing pancreaticoduodenectomy
Source: PeerJ journal article supplement (doi:10.7717/peerj.18753), 2024-12-19
Supplement: raw_data.zip [file raw_data.zip]

## Sheet: Sheet2
complication	VAVSAV	PNI	SIRI	TYGBMI	AGE	CA199	NLR	Diebetes	Gender	hypertension	Jaundice	HB	NWR
0	0	0	0	0	0	1	1.70303	0	1	0	1	154	0.616228
0	0	0	1	0	1	0	2.24848	0	0	0	0	140	0.555389
0	0	0	1	1	0	0	3.55856	0	0	0	0	125	0.521797
0	0	0	0	0	0	0	2.19101	0	0	0	0	133	0.590015
0	0	0	1	1	0	0	2.14124	0	0	0	1	150	0.612278
0	0	1	1	1	1	1	8.66337	0	0	0	0	101	0.827032
1	0	1	1	1	0	0	2.36	0	0	0	0	125	0.887218
1	1	1	1	1	0	0	2.41935	0	0	0	0	124	0.681818
0	0	1	1	1	0	0	2.60479	0	0	0	1	100	0.619658
0	0	1	1	1	0	1	2.41509	0	0	0	1	114	0.806299
0	0	0	1	1	0	1	2.83444	0	1	0	0	147	0.66563
0	0	0	0	1	0	1	1.58289	0	1	0	0	144	0.546125
0	1	1	0	1	0	0	1.94475	0	1	0	0	117	0.537405
0	0	0	0	1	1	1	2.08333	0	0	0	0	113	0.352113
0	0	0	0	0	1	0	1.75758	0	1	0	0	154	0.446154
0	1	0	1	0	0	1	3.92308	0	1	0	0	137	0.708333
0	0	1	1	1	1	1	2.59006	0	0	0	1	112	0.642527
0	0	1	1	1	0	0	18.5	1	1	1	1	139	0.898381
0	1	1	1	1	0	0	1.45517	0	0	0	0	119	0.460699
0	0	1	1	1	0	0	3.42194	1	0	1	0	138	0.865528
0	0	0	1	0	0	0	2.60479	1	1	0	0	143	0.619658
0	0	1	1	0	0	1	14.6972	0	1	0	1	113	0.837866
0	0	1	1	1	1	1	2.2	0	1	0	0	107	0.664653
0	0	1	1	1	1	0	4.83133	0	1	0	1	123	0.897092
0	1	1	1	1	1	0	1.88745	1	1	0	1	104	0.653673
1	0	0	1	1	0	0	2.72202	0	0	0	0	127	0.669627
0	0	0	0	1	0	1	1.7957	0	0	0	1	97	0.536977
0	0	0	0	0	0	0	1.27876	1	0	1	0	114	0.503484
0	0	1	0	0	1	1	1.96985	0	0	0	0	110	0.599388
0	0	1	1	0	0	0	2.63226	0	1	1	1	126	0.671053
0	0	0	0	1	1	1	0.810811	0	1	0	1	135	0.493151
1	1	1	1	1	0	0	12.5755	0	1	1	0	104	0.83995
1	1	1	1	1	0	0	3.40777	0	0	0	0	142	0.502146
0	0	1	1	1	0	0	3.42194	0	0	0	0	110	0.865528
0	0	1	1	1	0	0	6.22222	0	0	0	1	123	0.784314
0	1	1	1	1	0	0	3.77519	0	0	0	1	108	0.707849
0	0	0	0	1	0	0	1.58511	1	1	1	0	121	0.573077
0	0	1	0	1	0	0	0.939394	0	0	0	0	127	0.285276
0	0	1	1	1	0	0	3.42857	0	1	0	0	104	0.338028
0	0	1	1	1	0	0	2.14352	0	1	0	0	98	0.607612
0	0	1	0	1	0	1	2.38211	1	0	1	0	112	0.641138
0	0	1	0	1	0	0	1.19355	0	1	0	1	95	0.4625
0	0	1	1	1	0	0	2.16	0	0	0	0	139	0.828221
0	0	1	1	1	1	1	3.125	0	0	0	0	122	0.347222
0	0	0	0	1	0	0	1.22566	0	1	0	0	119	0.491135
0	0	0	1	1	1	0	2.96748	0	0	0	0	125	0.721772
0	0	1	1	1	0	0	2.65574	0	0	0	1	133	0.590164
0	0	1	1	1	1	1	3.00826	1	0	1	1	127	0.646536
0	0	0	0	1	1	0	1.83673	0	1	0	0	111	0.538922
0	0	1	1	1	0	1	2.98969	1	1	0	0	139	0.707317
0	0	0	0	1	0	0	2.66667	0	0	0	0	105	0.328767
0	0	1	1	1	0	0	4.83133	1	0	1	0	122	0.897092
0	0	0	0	0	1	0	1.60811	1	1	1	0	142	0.549654
0	0	1	1	0	0	1	3.40426	0	0	0	1	113	1.18519
0	0	0	1	0	0	1	1.32911	0	0	0	1	104	0.294668
1	0	0	1	1	1	0	4.66667	0	0	0	0	119	0.575342
0	0	0	0	0	0	1	1.38919	0	0	0	0	123	0.533195
1	0	1	1	1	0	1	3.10769	0	0	0	1	135	0.695353
0	0	0	0	0	0	0	0.90625	0	0	0	0	98	0.425577
0	0	0	0	0	1	0	0.837037	0	0	0	0	133	0.170437
0	0	1	1	0	0	1	10.56	0	0	0	0	143	1.99396
0	1	0	1	0	0	0	5.98437	0	1	0	1	130	7.02752
0	0	1	0	0	0	1	1.70303	0	0	1	1	103	0.616228
0	1	0	0	0	0	0	1.43548	1	1	1	0	144	0.518447
0	0	0	1	0	0	0	2.9	0	1	0	0	140	0.881459
0	0	1	0	0	1	1	1.72165	0	0	0	1	140	0.556667
0	0	1	0	0	1	1	1.92771	0	0	0	0	114	0.482655
0	0	0	0	0	1	0	1.58511	0	1	0	0	147	0.573077
0	1	0	1	0	0	0	3.01026	1	1	0	0	154	0.61466
0	0	0	1	0	0	0	2.51095	1	1	1	0	135	0.631193
0	0	1	0	0	1	0	1.56	0	0	0	0	116	0.586466
0	0	0	1	0	1	0	3.25806	0	0	0	0	140	1.36486
0	0	0	1	0	0	0	2.9	0	0	0	0	105	0.881459
0	0	0	0	0	0	1	1.33333	0	1	0	0	131	0.358209
0	0	0	0	0	0	0	1.46032	0	0	0	1	110	0.547619
0	1	0	1	0	0	1	2.73723	0	1	0	1	139	0.636672
0	1	1	1	0	0	1	2.77632	0	1	0	1	150	0.634905
0	0	1	1	0	1	1	16.1892	0	0	0	1	135	0.884786
0	0	1	1	0	0	0	2.14352	0	1	0	0	118	0.607612
0	0	0	0	0	0	0	2.36216	1	0	1	1	118	0.651267
0	0	0	1	0	0	1	2.21429	1	1	1	0	117	0.615523
0	0	0	1	0	0	0	2.61224	0	0	0	0	132	0.876712
0	0	0	0	0	1	1	1.68047	0	0	0	1	110	0.564612
0	1	1	1	0	0	0	3.77519	1	1	1	1	130	0.707849
0	0	0	1	0	0	1	3.02062	1	1	1	1	139	0.662896
0	0	0	1	0	0	1	3.02062	1	1	1	1	139	0.662896
0	0	0	0	0	1	1	0.775665	0	0	0	1	128	0.59824
0	0	0	1	0	0	0	3.13793	0	1	0	0	143	0.666667
0	0	0	0	0	0	1	1.68047	1	0	1	1	121	0.564612
0	0	0	1	0	0	0	2.86842	0	0	0	1	126	0.695745
0	0	0	1	0	0	1	4.67039	0	1	0	0	140	1.27439
1	0	0	1	1	0	1	1.80851	0	0	0	0	123	0.515933
1	0	0	1	1	1	0	1.98742	0	0	1	1	102	0.575592
0	0	1	1	0	0	0	1.83893	0	0	0	1	121	0.570833
0	1	0	1	0	1	1	4.86567	0	0	0	0	113	0.767059
0	0	0	1	0	1	1	6.95775	1	0	1	1	124	0.762346
0	0	0	1	0	0	0	3.13793	1	1	1	0	147	0.666667
0	1	1	1	0	0	0	13.1206	0	1	0	0	142	0.940997
0	0	1	0	0	1	0	1.51748	0	1	1	0	128	0.530562
0	0	1	1	0	1	1	1.87192	0	1	0	0	139	0.58193
0	0	0	0	0	0	0	1.93056	0	0	0	1	122	0.57438
0	0	0	1	0	0	1	12.8861	0	0	0	1	126	0.819646
0	0	1	0	0	0	0	1.39698	1	0	1	0	111	0.551587
1	0	1	1	1	0	1	4.4	0	0	0	0	136	0.488889
0	1	0	1	0	1	0	2.26267	0	0	0	0	111	0.603936
0	0	0	1	0	0	0	2.04237	0	0	0	0	104	0.866906
1	1	1	1	1	0	0	11.9196	0	1	0	1	92	0.856868
0	0	1	1	0	1	1	3.21429	0	0	0	0	125	0.616438
0	0	1	1	0	0	1	16.1892	0	0	1	0	127	0.884786
0	0	1	1	0	0	0	8.19512	0	1	0	1	167	0.765376
0	1	0	0	0	1	0	1.1608	0	1	1	0	118	0.553957
0	0	0	0	0	0	0	1.39698	0	0	0	1	139	0.551587
0	0	0	1	0	1	0	2.51095	0	0	0	0	122	0.631193
0	1	0	1	0	1	0	3.01026	0	0	0	0	95	0.61466
0	1	0	1	0	1	1	4.86567	1	1	1	0	127	0.767059
0	0	1	1	0	0	0	2.63226	0	0	0	1	119	0.671053
0	0	0	0	0	1	0	1.60606	0	0	0	0	118	0.548276
0	0	0	1	0	0	0	11.0366	0	1	0	0	106	2.70149
0	0	1	1	0	1	0	2.8141	1	1	1	0	123	0.647493
0	0	1	1	0	1	0	2.8141	1	1	1	0	123	0.647493
0	1	1	1	0	0	0	11.9196	0	1	0	0	120	0.856868
0	0	0	1	0	0	0	2.60674	0	1	0	0	143	0.783784
0	0	0	0	0	1	0	1.57143	0	1	0	0	140	0.502283
0	0	0	1	0	1	0	2.19048	0	0	0	0	142	0.647887
0	0	0	0	0	0	0	1.57143	0	0	0	0	124	0.502283
0	0	0	1	0	0	0	3.69231	0	0	0	1	105	0.662831
0	0	0	0	0	0	1	2.1	0	0	0	0	132	0.646154
0	0	1	1	0	1	1	2.2	0	1	0	0	110	0.664653
0	0	1	1	0	1	1	4	0	0	0	0	142	0.888889
0	1	0	0	0	0	0	1.1608	0	0	0	1	110	0.553957
0	0	1	0	0	0	0	1.51748	0	0	0	1	113	0.530562
0	0	0	1	0	0	0	2.47945	0	1	1	0	144	0.646429
0	0	0	0	0	0	0	0.90625	1	0	1	0	122	0.425577
0	0	0	1	0	0	0	2.86842	1	0	0	0	132	0.695745
0	1	1	1	0	1	1	4.80508	1	1	1	1	113	0.751989
0	0	1	1	0	1	1	6.95775	0	1	0	0	142	0.762346
0	0	0	1	0	0	1	2.9697	0	0	0	0	139	0.6125
0	0	1	0	0	0	0	1	0	0	0	0	126	0.356601
0	0	0	1	0	0	0	2.5566	0	1	0	1	145	0.602222
0	0	1	1	0	0	0	5.32	1	1	1	1	144	0.750353
0	0	0	1	0	1	1	2.21429	0	1	0	0	119	0.615523
0	0	0	1	0	0	1	3.02062	0	0	0	0	120	0.662896
1	1	1	1	0	1	1	3.16667	1	1	1	1	128	0.616883
0	0	0	1	0	0	0	5.15741	0	0	0	1	139	0.678441
0	1	0	1	0	0	0	2.26267	1	1	0	1	122	0.603936
0	0	0	0	0	1	1	1.16393	0	1	0	1	124	0.601695
0	1	1	0	0	1	0	2.1875	0	0	0	0	95	0.563003
0	0	1	1	0	1	1	14.6972	0	0	0	1	137	0.837866
0	0	0	1	0	0	1	3.63699	1	0	1	1	102	0.723433
0	0	1	0	0	0	1	1.17553	1	0	1	0	118	0.528708
0	0	1	1	0	1	0	1.72727	0	1	0	0	100	0.568012
0	1	1	1	0	0	1	3.16484	0	0	0	1	118	0.66055
0	0	0	1	0	0	0	3.55856	0	0	0	1	116	0.521797
0	0	1	1	0	0	1	2.36842	0	0	0	0	118	0.633803
0	0	0	0	0	0	0	1.40719	1	0	1	0	125	0.53288
0	0	0	0	0	0	0	1.07438	0	0	1	0	119	0.481481
1	0	1	1	1	1	0	2.78626	0	1	0	0	106	0.630397
1	1	1	1	1	1	1	4.70588	1	1	1	1	128	0.813559
0	1	0	1	0	1	0	5.98437	1	1	0	1	139	7.02752
0	0	1	0	0	1	1	1.17553	0	0	0	0	124	0.528708
0	0	1	0	0	1	1	2.38211	0	1	0	0	135	0.641138
1	0	1	0	1	1	0	1.60606	0	1	0	0	124	0.548276
0	1	1	1	0	0	0	1.45517	1	1	1	0	94	0.460699
0	0	1	1	0	1	1	2.82209	0	0	0	1	118	0.61745
1	1	1	1	1	1	1	4.26374	1	1	1	0	110	0.527174
1	1	1	1	1	1	1	3.16667	1	1	1	0	128	0.616883
0	0	0	1	0	1	0	2.46226	1	1	1	0	154	0.799387
0	1	1	1	0	0	0	2.60526	1	1	1	1	106	0.675768
0	0	0	1	0	0	0	3.69231	1	0	1	0	101	0.662831
0	0	0	1	0	0	1	6.10152	0	0	0	1	118	0.898356
1	0	1	1	0	0	1	3.47414	1	1	1	1	119	0.6448
0	1	0	1	0	1	0	2.85714	0	1	0	1	101	0.733945
0	0	0	0	0	0	1	1.58289	1	1	1	0	150	0.546125
1	0	1	1	0	0	0	3.24026	0	0	0	1	130	0.71184
0	0	1	1	0	0	0	2.14124	0	0	1	0	100	0.612278
0	0	1	1	0	0	1	8.66337	1	1	1	0	135	0.827032
0	0	0	1	0	0	1	2.57471	0	0	0	1	119	0.671664
0	0	0	1	0	1	1	2.83444	0	0	0	0	126	0.66563
0	0	0	0	0	0	1	1.45968	1	0	1	0	115	0.540299
0	0	1	1	0	0	0	1.98742	0	1	1	0	115	0.575592
0	0	1	0	0	1	0	1.52466	0	0	0	0	105	0.510511
0	0	1	1	0	1	0	3.28671	0	0	0	0	120	0.717557
0	0	0	1	0	1	0	2.5566	0	0	0	0	125	0.602222
0	0	0	1	0	0	0	2.72202	1	1	0	0	150	0.669627
0	0	1	0	0	0	1	1.17553	1	0	1	0	118	0.528708
0	0	1	1	0	1	0	18.5	0	1	0	0	135	0.898381
1	1	1	1	0	1	0	58.8333	1	0	1	0	108	0.94385
0	1	0	0	0	0	0	0.937956	0	1	0	1	138	0.430486
0	0	1	0	0	0	0	1.93043	1	0	1	0	119	0.608219
0	0	0	0	0	0	0	1.56566	0	0	0	0	107	0.466867
0	0	0	1	0	1	1	2.59055	0	1	0	0	137	0.646365
0	0	1	0	0	1	0	1.93043	0	0	0	0	103	0.608219
0	0	1	1	0	1	0	2.11364	0	0	0	0	144	0.699248
0	0	0	0	0	0	1	1.45968	0	0	0	0	112	0.540299
0	0	0	0	0	0	1	1.69014	0	1	0	1	146	0.55814
0	0	0	1	0	0	1	3.50588	0	1	0	0	97	0.905775
0	0	0	1	0	0	0	2.30323	0	0	1	0	122	0.59799
0	0	1	1	0	1	0	8.19512	0	1	1	0	142	0.765376
1	0	0	1	0	1	1	2.1087	0	1	0	0	105	0.670121
0	0	0	1	0	0	1	2.1087	0	0	1	0	126	0.670121
0	1	1	1	0	1	1	4.80508	0	0	0	0	131	0.751989
1	0	1	1	0	1	1	2.96667	0	1	0	0	136	0.501408
0	0	0	0	0	1	1	1.83621	0	1	0	0	121	0.580381
0	0	1	0	0	0	1	1.89944	0	1	0	0	110	0.509745
0	0	0	0	0	0	1	1.14222	0	1	0	0	134	0.477695
0	0	1	0	0	1	0	1.95455	1	1	1	0	126	0.573333
0	1	1	1	0	1	0	13.1206	0	0	0	1	145	0.940997
0	0	0	1	0	1	1	6.10152	0	1	0	1	110	0.898356
0	0	1	1	0	0	0	2.50655	1	1	0	0	141	0.71393
0	0	0	0	0	1	1	1.38919	0	0	0	1	115	0.533195
0	0	0	1	0	1	1	1.73654	1	0	1	0	135	0.515126
0	0	0	0	0	0	1	1.69014	1	0	0	0	139	0.55814
0	1	0	1	0	1	0	2.85714	1	1	1	0	140	0.733945
0	0	0	1	0	1	1	2.59322	0	1	0	1	102	0.628337
0	0	0	1	0	0	0	3.79618	0	0	0	1	134	0.705325
0	1	1	1	0	0	0	5.17476	0	1	0	1	123	0.731139
0	0	1	1	0	0	0	2.78626	0	1	0	0	137	0.630397
1	1	1	1	0	0	1	2.35185	1	1	1	1	132	0.625616
0	0	0	0	0	0	0	0.688889	0	0	0	0	134	0.283105
0	0	0	0	0	0	0	1.22566	1	1	1	0	133	0.491135
0	0	0	1	0	0	1	2.23438	0	0	0	0	100	0.66
1	1	1	1	0	0	1	2.35185	1	1	1	0	132	0.625616
1	1	1	1	0	0	0	2.92593	1	1	1	0	116	0.650741
0	0	0	0	0	0	1	1.73684	0	0	0	0	130	0.452055
0	0	1	1	0	1	1	2.59006	1	1	1	1	104	0.642527
0	0	1	1	0	0	0	3.21244	1	0	1	0	93	0.952381
0	1	1	0	0	0	0	2.1875	1	1	1	0	133	0.563003
0	0	0	0	0	0	0	2.88	0	1	0	1	133	0.500695
0	0	1	1	0	0	0	2.14352	1	1	1	0	110	0.607612
0	1	0	1	0	0	1	3.26531	0	1	0	0	158	0.817369
0	0	1	0	0	0	0	0.939394	1	0	1	1	110	0.285276
0	0	1	1	0	1	1	3.40426	1	0	0	1	121	1.18519
0	0	0	1	0	0	0	2.6087	0	1	0	0	120	0.659341
0	0	0	0	0	0	0	1.54321	0	0	0	0	120	0.384615
0	0	0	0	0	0	0	1.60811	0	1	0	1	122	0.549654
0	0	0	1	0	1	0	2.225	0	1	0	1	143	0.949333
0	0	1	0	0	0	0	1.95455	0	1	0	1	126	0.573333
0	0	0	0	0	0	0	1.46032	1	0	0	0	139	0.547619
0	1	1	1	0	0	0	1.88745	0	1	0	1	116	0.653673
0	0	1	1	0	1	1	3.13333	0	1	0	0	143	0.712121
0	1	1	1	0	1	1	2.77632	1	1	1	0	95	0.634905
0	0	1	1	0	0	1	2.57143	0	1	0	0	119	0.759036
1	0	1	1	0	0	1	2.59055	0	1	0	1	141	0.406675
0	0	1	1	0	1	1	5.52727	0	1	1	0	128	0.726404
0	0	1	1	0	0	0	2.8141	0	0	0	0	123	0.647493
0	0	1	1	0	0	1	2.72414	1	1	1	0	123	0.617188
0	0	1	1	0	1	0	2.65574	1	1	1	0	141	0.590164
1	0	1	1	0	1	0	2.6087	0	1	0	0	113	1.04046
0	0	1	0	0	0	0	2.06061	0	0	0	1	141	0.607143
0	1	0	1	0	0	1	2.83217	1	1	1	0	98	0.694683
1	0	1	1	0	0	1	4.42241	0	0	0	0	130	0.66884
0	0	0	1	0	1	1	2.57471	0	0	0	0	148	0.671664
0	0	0	0	0	0	0	2.36216	0	1	0	0	115	0.651267
0	0	0	0	0	1	0	2.88	0	0	0	0	126	0.500695
1	1	1	1	0	0	0	2.15882	1	1	1	1	135	0.598695
0	0	0	1	0	0	0	2.96748	0	0	0	0	123	0.721772
1	1	1	1	0	1	1	5.05738	1	1	1	1	131	0.714948
0	0	0	0	0	0	1	1.65605	0	0	0	0	103	0.393939
0	1	0	1	0	0	0	1.72932	0	1	0	0	148	0.69697
1	1	1	1	0	1	0	3.04839	0	0	0	0	121	1.36627
0	0	0	0	0	1	1	1.7957	1	0	1	0	117	0.536977
0	1	1	0	0	1	0	2.60526	0	1	0	1	111	0.675768
0	0	1	1	0	0	0	1.71552	0	0	1	0	118	0.621875
0	0	0	1	0	0	1	3.10769	1	1	1	0	142	0.695353
0	0	0	1	0	1	1	1.73654	0	0	0	0	147	0.515126
0	0	0	0	0	1	0	1.56566	0	0	0	0	126	0.466867
0	1	0	1	0	0	1	2.73723	0	1	1	1	133	0.636672
0	0	0	0	0	0	0	2.0625	1	0	0	0	104	0.634615
0	0	0	0	0	0	0	1.40719	0	0	0	0	125	0.53288
0	0	0	0	0	0	0	1.93056	0	1	0	0	148	0.57438
0	0	0	0	0	1	0	1.29221	0	0	1	1	115	0.496259
0	0	0	1	0	1	1	1.84085	0	1	0	0	116	0.569319
0	0	1	1	0	0	1	2.98969	0	1	0	1	119	0.707317
0	0	1	1	0	0	0	1.83893	0	1	0	0	135	0.570833
0	0	0	1	0	1	0	2.64063	0	0	0	1	123	0.660156
0	0	0	1	0	0	0	1.8805	0	1	0	0	114	0.56203
0	0	1	1	0	0	0	3.42857	0	0	0	0	142	0.338028
0	0	0	0	0	1	0	2.19101	0	1	0	0	125	0.590015
1	1	1	1	0	1	0	8.07273	1	0	1	1	115	1.01835
0	1	1	1	0	1	1	3.92308	0	1	0	0	135	0.708333
0	1	0	1	0	0	1	2.83217	0	1	0	1	146	0.694683
0	0	1	1	0	1	0	2.03209	0	1	0	0	171	0.583717
1	0	1	1	0	1	1	2.80328	0	0	0	0	138	0.680371
1	1	1	1	0	1	1	2.89394	0	1	0	0	121	0.545714
1	0	1	1	0	0	1	3.21429	0	0	0	0	121	0.616438
0	0	0	1	0	0	1	1.84085	1	0	1	1	131	0.569319
0	0	0	1	0	0	0	3.79618	0	0	1	0	124	0.705325
0	0	1	0	0	0	0	2.06061	1	0	1	0	110	0.607143
0	0	0	1	0	0	1	4.67039	0	1	0	0	136	1.27439
0	1	1	1	0	0	0	12.5755	0	1	1	1	119	0.83995
0	1	1	1	0	0	0	3.40777	0	0	0	0	131	0.703407
0	0	1	0	0	0	1	1.80851	0	0	0	0	94	0.515933
0	0	0	0	0	1	1	0.508475	1	0	1	0	147	0.298013
1	1	1	1	0	1	1	4.14286	1	1	0	1	110	0.84058
1	1	1	1	0	1	1	4.44444	1	1	0	1	141	0.571429
0	0	0	1	0	0	0	2.95775	0	0	0	1	127	0.663507
0	0	1	1	0	1	1	2.72414	0	0	0	0	115	0.617188
0	0	0	1	0	1	1	2.9697	0	0	0	1	142	0.6125
0	0	0	0	0	0	0	1.07438	0	1	0	1	124	0.481481
0	0	1	1	0	0	0	3.21244	0	0	0	0	117	0.952381
0	0	0	0	0	0	1	0.508475	0	1	0	0	154	0.298013
0	0	1	1	0	1	0	2.50655	0	0	0	1	126	0.71393
0	0	0	1	0	0	0	2.64063	1	0	1	0	120	0.660156
0	0	1	0	0	0	1	1.92771	0	1	0	0	108	0.482655
0	0	0	0	0	1	0	1.21053	0	0	0	0	139	0.350076
0	0	0	1	0	1	0	7.59	0	1	0	1	115	0.796015
0	0	0	1	0	0	1	4.29825	0	1	1	0	140	0.827703
1	1	1	1	0	1	1	2.22222	1	1	0	1	119	0.56338
0	0	0	1	0	0	0	4.10884	0	0	1	0	140	0.76359
0	0	0	1	0	1	0	3.00735	1	1	1	0	126	0.644094
1	1	1	1	0	1	1	4.5974	1	1	1	0	96	0.516035
0	0	0	1	0	0	0	1.8805	1	1	1	0	119	0.56203
0	0	0	1	0	0	1	3.66387	1	0	1	0	136	0.659607
0	0	1	1	0	1	0	3.19231	0	1	0	1	132	0.646753
0	0	0	1	0	0	1	3.63699	0	0	0	0	123	0.723433
0	1	1	1	0	1	0	2.41935	0	1	0	0	139	0.681818
0	0	0	1	0	0	1	2.23438	0	1	1	0	146	0.66
0	1	0	1	0	0	1	3.26531	1	1	1	1	105	0.817369
1	1	1	1	0	1	1	3.33333	1	1	0	1	122	0.637681
0	0	1	0	0	0	0	1.19355	1	0	0	0	123	0.4625
0	0	0	0	0	1	1	0.775665	1	0	1	1	105	0.59824
0	0	0	1	0	0	1	4.29825	0	0	0	1	94	0.827703
0	1	1	1	0	1	0	2.22642	0	1	0	0	111	0.707646
1	0	1	1	0	0	1	2.5493	1	0	1	0	92	0.603333
0	0	1	1	0	1	1	5.52727	0	0	0	1	119	0.726404
0	0	1	0	0	1	1	1.72165	1	0	1	1	111	0.556667
1	0	1	1	0	1	1	2.59322	0	0	0	0	142	0.388818
0	0	0	1	0	1	0	7.59	1	0	1	0	97	0.796015
0	0	0	1	0	1	0	2.95775	1	0	0	0	103	0.663507
1	1	1	1	0	0	0	3.50658	1	1	1	1	118	0.740278
1	1	1	1	0	0	1	7.98148	1	1	1	1	102	1.27893
1	1	1	1	0	1	0	5.17476	0	1	1	0	101	0.731139
0	0	0	1	0	0	0	2.30323	0	0	0	1	121	0.59799
0	0	1	1	0	0	0	1.71552	0	0	0	1	127	0.621875
0	0	1	1	0	1	0	3.28671	0	0	0	0	140	0.717557
0	0	1	1	0	0	1	2.82209	0	1	0	0	112	0.61745
0	0	0	1	0	0	1	1.32911	1	1	1	0	134	0.294668
0	0	1	1	0	0	0	5.32	0	0	0	1	115	0.750353
0	0	0	1	0	0	1	3.66387	0	1	0	1	95	0.659607
0	0	1	1	0	1	0	6.22222	1	0	1	0	100	0.784314
1	0	0	0	0	0	1	2.03111	0	1	0	0	114	0.849442
0	0	0	0	0	1	0	1.66471	0	0	0	0	119	0.56487
0	0	0	1	0	0	0	3.00735	0	0	0	0	123	0.644094
0	0	1	1	0	0	1	3.00826	0	0	0	1	110	0.646536
0	0	1	1	0	1	0	3.19231	1	1	1	0	119	0.646753
0	0	0	0	0	0	1	0.810811	1	0	1	0	112	0.493151
0	0	0	1	0	1	0	5.15741	0	0	0	0	144	0.678441
0	0	0	1	0	1	0	2.46226	0	0	0	1	92	0.799387
0	0	1	1	0	1	0	2.14352	1	1	1	0	110	0.607612
1	1	0	1	0	0	0	1.66788	0	0	0	0	90	0.765494
0	0	0	1	0	1	0	2.225	1	0	0	0	118	0.949333
0	0	0	0	0	0	0	2.0625	0	1	0	1	105	0.634615
0	1	0	1	0	1	1	8.11111	0	1	0	0	104	1.01389
0	0	0	1	0	1	0	4.10884	0	1	0	1	102	0.76359
0	0	0	1	0	1	1	12.8861	0	1	1	0	114	0.819646
0	0	0	1	0	1	0	2.60674	0	0	1	1	107	0.783784
1	0	1	1	0	1	0	2.47945	0	1	0	0	114	0.786957
0	0	0	0	0	0	0	1.66471	0	1	0	0	122	0.56487
0	0	0	0	0	1	0	1.27876	0	1	0	1	125	0.503484
0	0	0	1	0	0	1	2.41509	1	0	0	1	123	0.806299
